# Supplementary material for: Chromatin signatures at transcriptional start sites separate two equally populated yet distinct classes of intergenic long noncoding RNAs
Source: PubMed Central journal article supplement (PMC4054604; doi:10.1186/gb-2013-14-11-r131), 2013-11-29

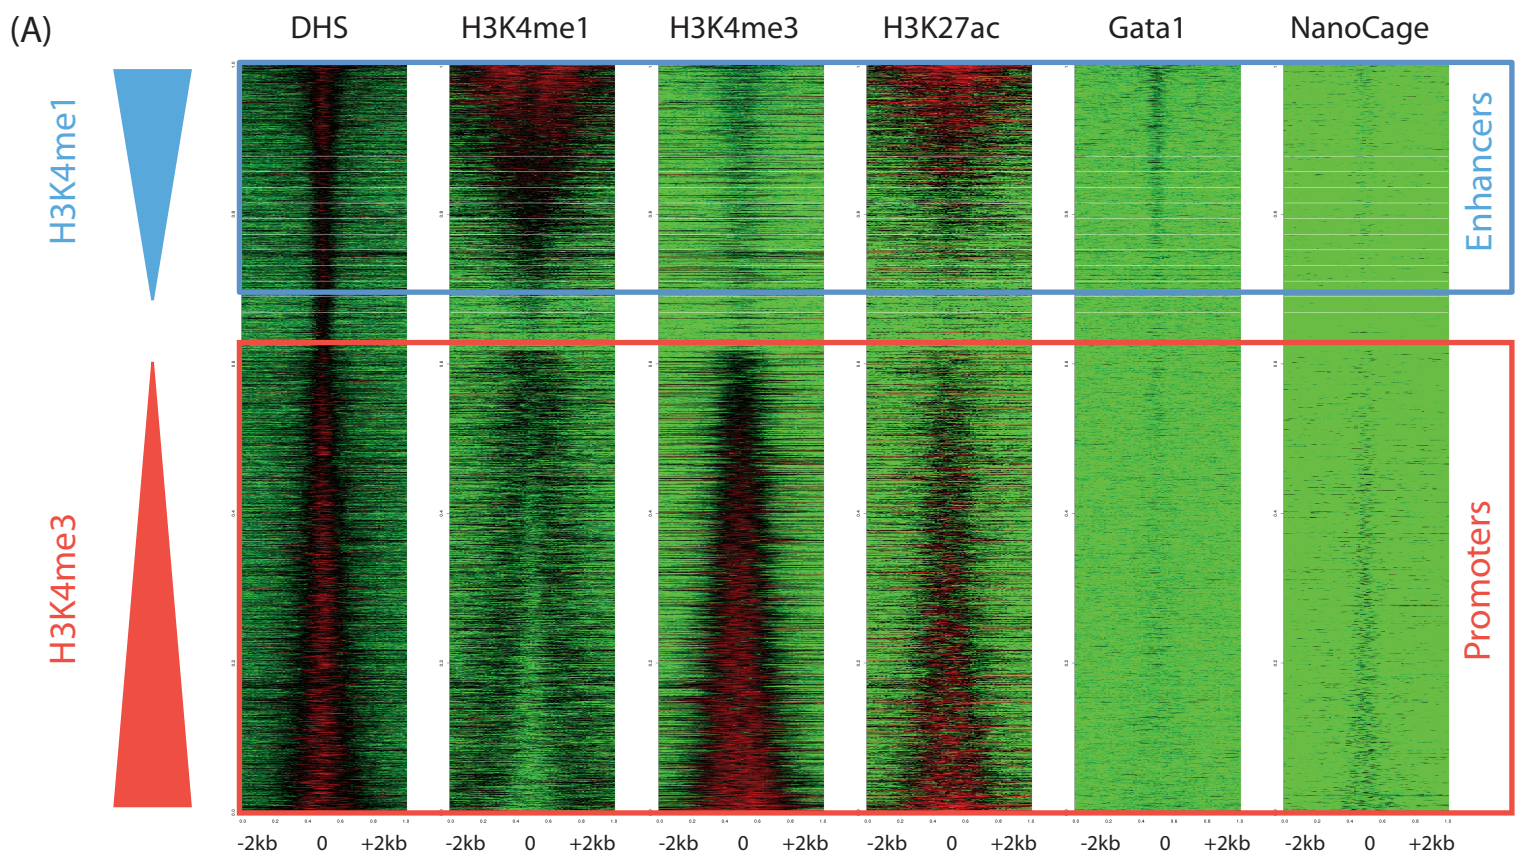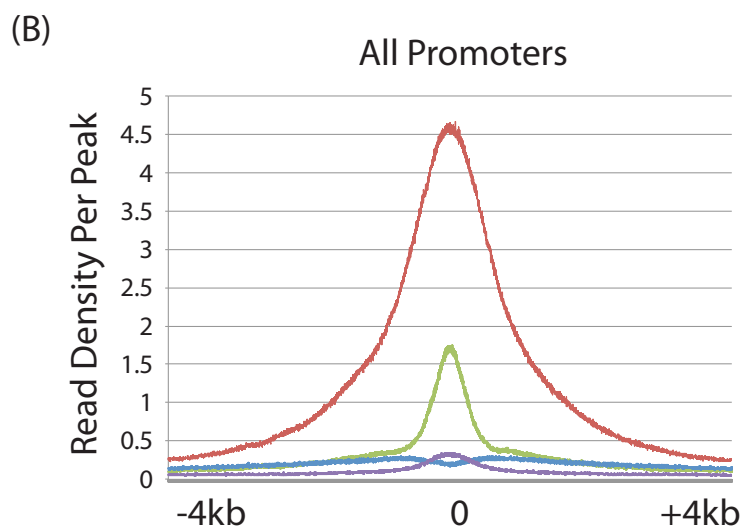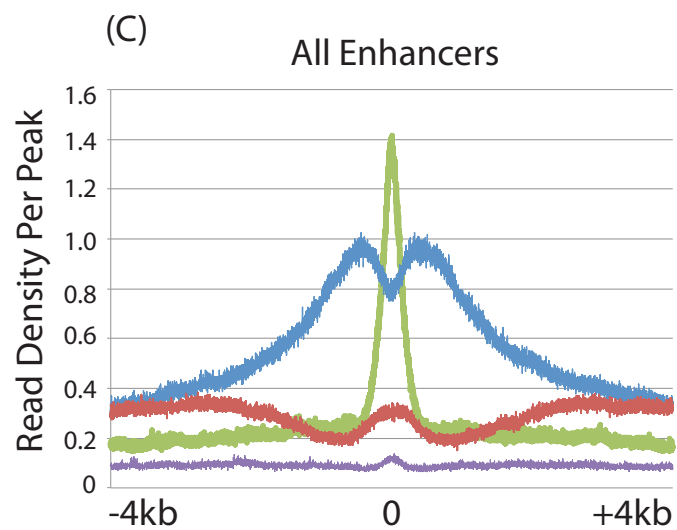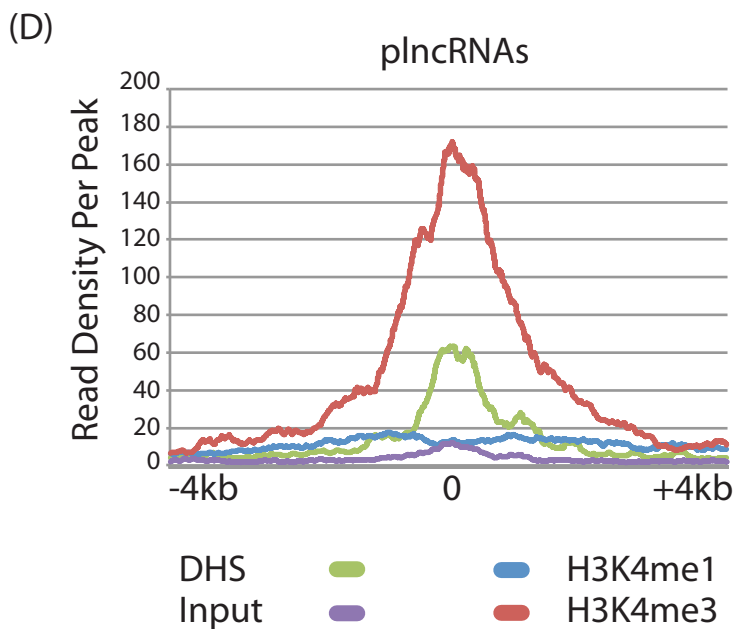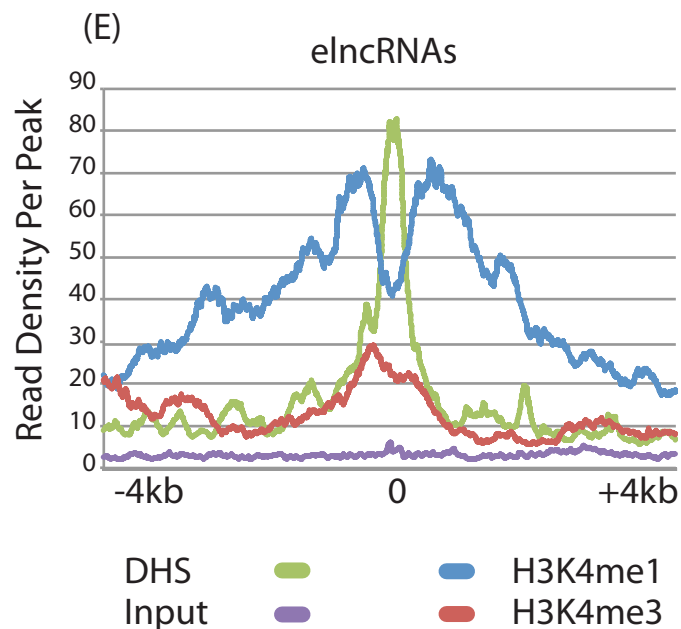

Supplement: gb-2013-14-11-r131-S5.pdf [file gb-2013-14-11-r131-S5.pdf]
