# Supplementary material for: Chromatin signatures at transcriptional start sites separate two equally populated yet distinct classes of intergenic long noncoding RNAs
Source: PubMed Central journal article supplement (PMC4054604; doi:10.1186/gb-2013-14-11-r131), 2013-11-29
Supplement: gb-2013-14-11-r131-S17.pdf [file gb-2013-14-11-r131-S17.pdf]

| eIncRNA      |                       |                       |
|--------------|-----------------------|-----------------------|
| Location     | Forward (5' - 3')     | Reverse (5' - 3')     |
| chr7.6727.1  | ATTGGTCTCTTGGCACCTTGG | GAGACCCTGTGCTCTTTGTCC |
| chr1.6716.1  | GACTGCGCTCTCTCATAGGC  | TACGGTCTGTACAGGTGGG   |
| chr17.2833.1 | AGAAGTCGCCCTGTCTGTT   | GGGGTGATGTGAGGGTTCCA  |
| chr12.8310.1 | GGTTCGAGGCTCACACTAC   | GCAGGTGAGAAGGCTGGTTC  |
| chr3.344.1   | CCACGGGCAACTGAAGCTAAT | TGTGGCTGGCATCCAATGAG  |

| Nearest protein-coding gene |                         |                         |
|-----------------------------|-------------------------|-------------------------|
| Gene                        | Forward (5' - 3')       | Reverse (5' - 3')       |
| <i>Hbb-y</i>                | TGGCCTGTGGAGTAAGGTCAA   | GAAGCAGAGGACAAGTTCCCA   |
| <i>Dyrk3</i>                | CCCACCCTATTCGGACACATT   | TGAAACAGTTGTTCCACCTTCAT |
| <i>Pim1</i>                 | CTGGAGTCGCAGTACCAGG     | CAGTTCTCCCAATCGGAAATC   |
| <i>Eif5</i>                 | AAATCAGTGACCATGCAAAAGGT | TGCCTCAGCCACAATTTCTTTA  |
| <i>Car2</i>                 | TCCCACCACTGGGGATACAG    | CTCTTGACGCAGCTTTATCATA  |

| plncRNA      |                       |                        |
|--------------|-----------------------|------------------------|
| Location     | Forward (5' - 3')     | Reverse (5' - 3')      |
| chr1.7191.1  | AGTCTGGCAGGTTAGTGTGGA | GGTGTCCCTCAGCAACCAAAAT |
| chr6.2692.1  | GCTCGGAAGTTTCAGCCCTC  | GTGCGTTTCACAAGGCGTTC   |
| chr2.6240.1  | TTGACCATCTTCGCCTCCCT  | CGACTTGCACTGTGGGTCTC   |
| chr9.5387.1  | GGGCCCAGATGTGGATAACAG | TGAGCTCACCTCTCTGCTGG   |
| chr13.2692.1 | TAGCTGCGACCTACGGTGAG  | CTCCGGCTGCAAGCAATACA   |

| Nearest protein-coding gene |                         |                        |
|-----------------------------|-------------------------|------------------------|
| Gene                        | Forward (5' - 3')       | Reverse (5' - 3')      |
| <i>Btg2</i>                 | ATGAGCCACGGGAAGAGAA     | GCCCTACTGAAAACCTTGAGTC |
| <i>Jhdm1d</i>               | GGCAAACCAGTTAAATCTCAGGG | AGGTTAGAAGGAGTTCGGACAT |
| <i>Hnmpa3</i>               | GAGGAGGGCCATGATCCAAG    | GTCTGTAAGTGTGCCCCATTT  |
| <i>Mns1</i>                 | AAGTGGTGCAAAATGAAAACGAC | ATCCTTCAGACTCTCGTGCTT  |
| <i>Nup153</i>               | CGGTGAAGCCTTACCAACAGG   | GTTCTCATCCGCATAAATCGCA |
